# Supplementary material for: Niobium tetrachloride complexes with thio-, seleno- and telluro-ether coordination – synthesis and structures
Source: Royal Society of Chemistry journal article supplement (doi:10.1039/c6dt02979e), 2016-01-01
Supplement: c6dt02979e1.pdf [file c6dt02979e1.pdf]

ESI

## Niobium tetrachloride complexes with thio-, seleno- and telluro-ether coordination – synthesis and structures

Yao-Pang Chang, William Levason, Mark E. Light and Gillian Reid

As noted in the main text, trace hydrolysis/air oxidation in the Nb(IV) systems can lead to Nb(V) products. Crystals of two examples containing NbOCl<sub>3</sub> were isolated in this work and their structures determined.

### [NbOCl<sub>3</sub>(Me<sub>2</sub>S)]

The green crystals were formed during recrystallisation of brown [NbCl<sub>4</sub>(Me<sub>2</sub>S)<sub>2</sub>] from CH<sub>2</sub>Cl<sub>2</sub> by layered with n-hexane. The structure contains two slightly different molecules in the unit cell, both square pyramidal with an apical oxo-group which are linked into chains by asymmetric oxido-bridges, Nb1–O1 = 1.744(3), Nb1–O1<sup>ii</sup> = 2.224(3). (Figure S1). As observed for the Nb(IV) complexes, there is little difference in Nb–Cl<sub>transS</sub> and Nb–Cl<sub>transCl</sub>.

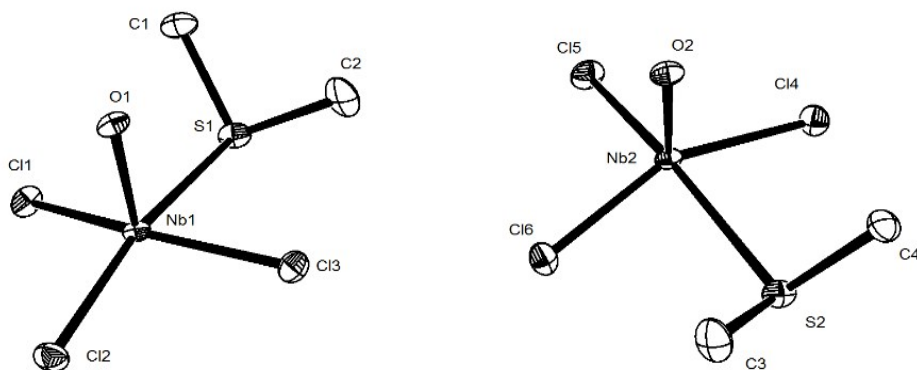

(a)

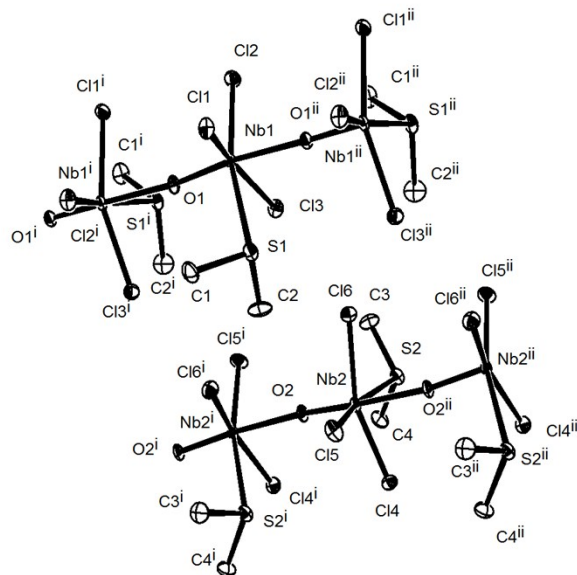

(b)

Figure S1 (a) The structure of  $[\text{NbOCl}_3(\text{Me}_2\text{S})]$  showing the atom numbering scheme and with ellipsoids drawn at the 50% probability level. Hydrogen atoms are omitted for clarity. Selected bond lengths ( $\text{\AA}$ ) and angles ( $^\circ$ ):  $\text{Nb1-O1} = 1.744(3)$ ,  $\text{Nb1-O1}^{\text{ii}} = 2.224(3)$ ,  $\text{Nb1-Cl1} = 2.336(1)$ ,  $\text{Nb1-Cl2} = 2.310(1)$ ,  $\text{Nb1-Cl3} = 2.360(2)$ ,  $\text{Nb1-S1} = 2.692(2)$ ,  $\text{Nb2-O2} = 1.746(3)$ ,  $\text{Nb2-O2}^{\text{ii}} = 2.232(3)$ ,  $\text{Nb2-Cl4} = 2.332(2)$ ,  $\text{Nb2-Cl5} = 2.336(1)$ ,  $\text{Nb2-Cl6} = 2.344(2)$ ,  $\text{Nb2-S2} = 2.684(1)$ ;  $\text{O1-Nb1-O1}^{\text{ii}} = 172.5(2)$ ,  $\text{O1-Nb1-Cl1} = 97.6(1)$ ,  $\text{O1-Nb1-Cl2} = 100.3(1)$ ,  $\text{O1-Nb1-Cl3} = 96.3(1)$ ,  $\text{O1-Nb1-S1} = 93.9(1)$ ,  $\text{Nb1-O1-Nb1}^{\text{i}} = 171.9(2)$ ,  $\text{O2-Nb2-O2}^{\text{ii}} = 173.16(7)$ ,  $\text{O2-Nb2-Cl4} = 97.5(1)$ ,  $\text{O2-Nb2-Cl5} = 99.7(1)$ ,  $\text{O2-Nb2-Cl6} = 97.0(1)$ ,  $\text{O2-Nb2-S2} = 93.3(1)$ ,  $\text{Nb2-O2-Nb2}^{\text{ii}} = 168.9(2)$ . Symmetry operation:  $i = x, -y+1/2, z+1/2$ ,  $ii = x, -y+1/2, z-1/2$ , (b) the polymeric chain.

The Nb–Cl and Nb–S distances seem unexceptional, and the disparate Nb–O are similar to those found in solid  $\text{NbOCl}_3$ ,<sup>S1</sup> which is dimeric with each niobium in an edge-linked distorted octahedron of four chlorines and two *trans* oxides ( $\text{Nb-O} = 2.203(3), 1.758(3) \text{ \AA}$ ), which weakly link the dimers into polymer chains.

$[\text{NbOCl}_3\{\text{MeS}(\text{CH}_2)_2\text{SMe}\}]$  This was obtained as the bulk product from one reaction, no doubt due to adventitious oxidation/hydrolysis.

$\text{NbCl}_4$  (73 mg, 0.3 mmol) was suspended in  $\text{CH}_2\text{Cl}_2$  (15 mL) at room temperature. A solution of  $\text{MeS}(\text{CH}_2)_2\text{SMe}$  (36.6 mg, 0.3 mmol) and  $\text{CH}_2\text{Cl}_2$  (2 mL) was added and the mixture stirred overnight. After filtering the pale green solution was evaporated *in vacuo*, leaving a pale green powder. Yield: 39 mg, 36%. Required for  $\text{C}_4\text{H}_{10}\text{Cl}_3\text{NbOS}_2$  (337.52): C, 14.23; H, 2.99. Found: C, 13.55; H 2.94. IR (Nujol,  $\text{cm}^{-1}$ ): 939 (Nb=O), 325, 344, 363 (Nb-Cl).  $^1\text{H NMR}$  ( $\text{CDCl}_3$ , 295 K):  $\delta = 2.19$  (br, [3H],  $\text{CH}_3$ ), 2.48 (br, [3H],  $\text{CH}_3$ ), 2.76 (br, [2H],  $\text{CH}_2$ ), 3.16 (br, [2H],  $\text{CH}_2$ ).

Pale green crystals were grown by allowing a  $\text{CH}_2\text{Cl}_2$  solution of the complex to evaporate under a  $\text{N}_2$  atmosphere.

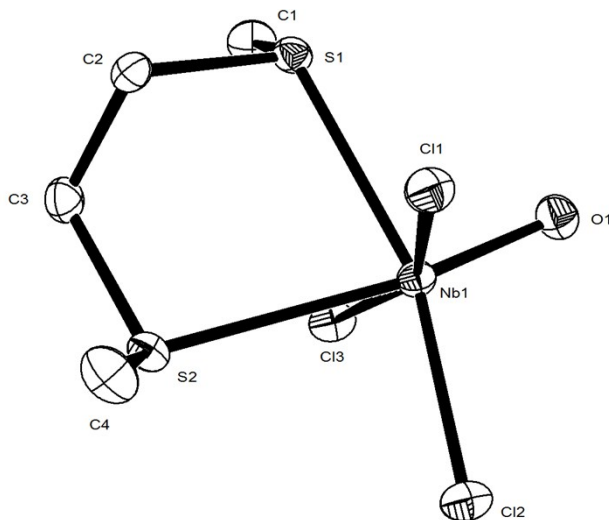

Figure S2. The structure of  $[\text{NbOCl}_3\{\text{MeS}(\text{CH}_2)_2\text{SMe}\}]$  showing the atom numbering scheme and with ellipsoids drawn at the 50% probability level. Hydrogen atoms are omitted for clarity. Selected bond lengths ( $\text{\AA}$ ) and angles ( $^\circ$ ):  $\text{Cl1-Nb1} = 2.375(1)$ ,  $\text{Cl2-Nb1} = 2.339(1)$ ,  $\text{Cl3-Nb1} = 2.369(1)$ ,  $\text{O1-Nb1} = 1.718(4)$ ,  $\text{S1-Nb1} = 2.664(1)$ ,  $\text{S2-Nb1} = 2.856(1)$ ;  $\text{Cl1-Nb1-Cl3} = 158.15(5)$ ,  $\text{Cl2-Nb1-O1} = 105.17(15)$ ,  $\text{S1-Nb1-S2} = 77.50(4)$ ,  $\text{O(1)-Nb(1)-Cl(3)} = 97.22(14)$ ,  $\text{Cl(2)-Nb(1)-Cl(3)} = 97.03(5)$ ,  $\text{O(1)-Nb(1)-Cl(1)} = 98.34(14)$ ,  $\text{Cl(2)-Nb(1)-Cl(1)} = 93.59(5)$ ,  $\text{O(1)-Nb(1)-S(1)} = 93.95(14)$ ,  $\text{Cl(3)-Nb(1)-S(1)} = 86.16(4)$ ,  $\text{Cl(1)-Nb(1)-S(1)} = 77.56(4)$ ,  $\text{Cl(2)-Nb(1)-S(2)} = 83.98(5)$ ,  $\text{Cl(3)-Nb(1)-S(2)} = 76.86(5)$ ,  $\text{Cl(1)-Nb(1)-S(2)} = 85.38(4)$ .

## References

S1. M. Ströbele and H.-J. Meyer, *Z. Anorg. Allg. Chem.*, 2002, **628**, 488.

## On the structure of $[\text{Nb}_2\text{Cl}_4(\mu\text{-Se}_x)_2\{o\text{-C}_6\text{H}_4(\text{CH}_2)_2\text{Se}\}_4]$

As briefly described in the main text there is some ambiguity over the bridging unit. The molecule exhibits inversion symmetry at the centre of the  $\text{Nb}_2\text{Cl}_2\text{Se}_{4+x}$  core – the discussions below are with reference to the asymmetric unit.

Initial refinements proceed as expected with the large electron density peak refined as a single Se atom, this has the expected geometry for such a species forming a  $\mu^2$  bridge (cf. Ta-Se in  $[\text{Ta}_2\text{Cl}_4(\mu\text{-Se})_2\{o\text{-C}_6\text{H}_4(\text{CH}_2\text{SeMe})_2\}_2]$ <sup>11</sup> 2.484(2), 2.489(2)  $\text{\AA}$ ). However, significant electron density remains asymmetrically above (1.302 $\text{\AA}$ ) and below (0.982 $\text{\AA}$ ) this site and free refinement of the occupancies give the values below, and the geometry of the 2 new positions is consistent with an  $\text{Se}_2$  unit<sup>29</sup> (2.73(1), 2.65(1) $\text{\AA}$ ). The difficulty of interpretation arises from the occupancy sum of 1.0 so that a mixture of single bridge and double bridge situations cannot exist without also involving a partially vacant bridge

site. The complex  $[\text{Nb}_2\text{Cl}_4(\text{S}_2)\text{S}(\text{tht})_4]^{2+}$  is a sulphur bridged analogue of the minor component reported here.

**Refined occupancies of the electron density peaks:**

The difference peaks appear to represent real electron density (not Fourier truncation peaks).

Refined occupancies (EADP constraints) – 0.057, 0.89, 0.057

Refined occupancies (no ADP constraints) – 0.056, 0.89, 0.059

**Selected Bond lengths:**

Nb1–Se3 = 2.4579(8) Å

Nb1–Se3a = 2.731 Å (2.618, 2.642, 2.259 Å)

Nb1–Se3b = 2.715 Å

Se3a–Se3b = 2.283 Å (2.259 Å)

Nb1–Nb1<sup>i</sup> = 2.898 Å (2.972 Å)

Values in parentheses are from Reference 29 for comparison.

**Refinement:**

EADP Se3, Se3a & Se3b was required to retain realistic thermal parameters.

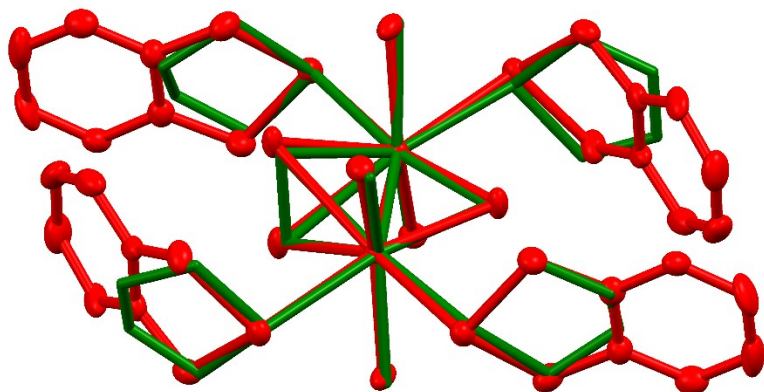

Overlay of CCDC CAMZUL (Nb-S)<sup>S2</sup> and the current structure (Nb-Se) comparing the potentially similar bridging arrangements.

The minor species could also be interpreted as a single bridging Se with a butterfly shape (sometimes sitting above and sometimes below the plane of the major species). We thank a reviewer for this suggestion.

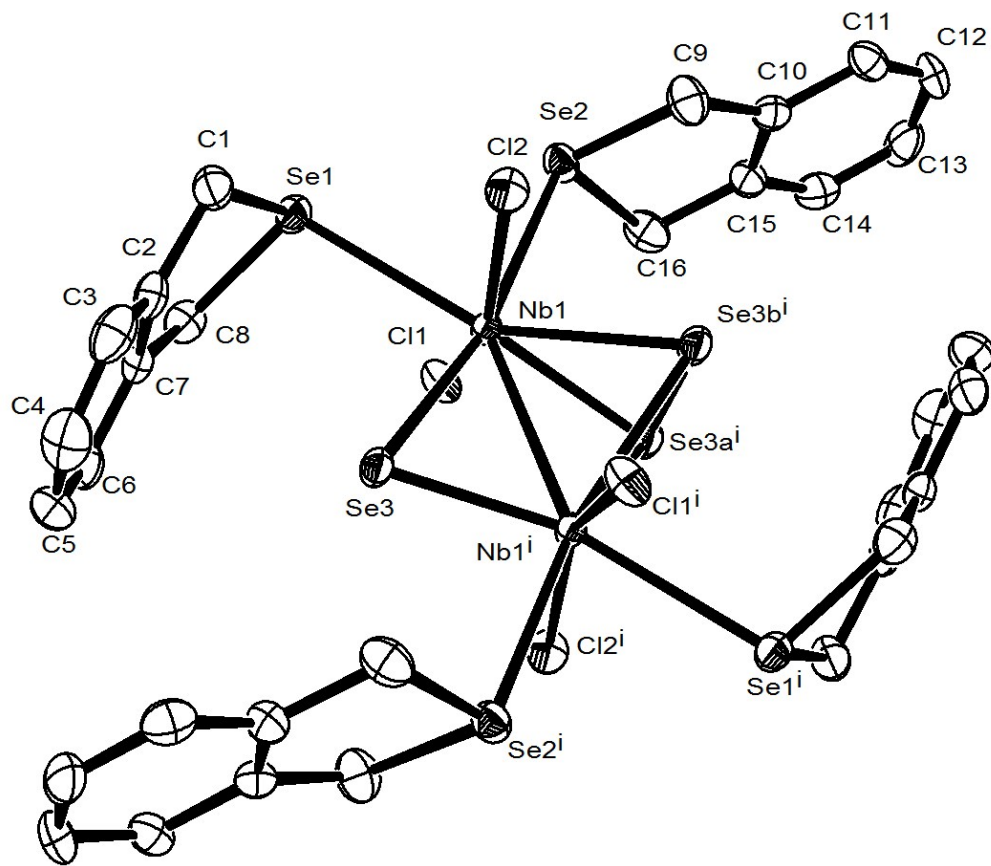

Figure S3. The structure of  $[\text{Nb}_2\text{Cl}_4(\mu\text{-Se}_2)(\mu\text{-Se})\{o\text{-C}_6\text{H}_4(\text{CH}_2)_2\text{Se}\}_4]$  as refined showing the atom numbering scheme and with ellipsoids drawn at the 50% probability level. Hydrogen atoms are omitted for clarity. Selected bond lengths ( $\text{\AA}$ ) and angles ( $^\circ$ ): Nb–Cl1 = 2.384(1), Nb1–Cl2 = 2.372(2), Nb1–Nb1<sup>i</sup> = 2.8980(9), Nb1–Se1 = 2.8266(8), Nb1–Se2 = 2.8214(7), Nb1–Se3 = 2.4578(8), Nb1–Se3a<sup>i</sup> = 2.73(1), Nb1–Se3b<sup>i</sup> = 2.65(1); Cl1–Nb1–Cl2 = 152.68(6), Se1–Nb1–Se2 = 79.79(2). Symmetry operation:  $i = 1-x, -y, -z$ .

Table S1 X-ray crystallographic data

|                                                                     |                                                    |                                                                  |
|---------------------------------------------------------------------|----------------------------------------------------|------------------------------------------------------------------|
| Compound                                                            | [NbOCl <sub>3</sub> (SMe <sub>2</sub> )]           | [NbOCl <sub>3</sub> {MeS(CH <sub>2</sub> ) <sub>2</sub> SMe}]    |
| Formula                                                             | C <sub>2</sub> H <sub>6</sub> Cl <sub>3</sub> NbOS | C <sub>4</sub> H <sub>10</sub> Cl <sub>3</sub> NbOS <sub>2</sub> |
| Formula weight                                                      | 277.39                                             | 337.5                                                            |
| Crystal system                                                      | Monoclinic                                         | Triclinic                                                        |
| Space group (no)                                                    | P2 <sub>1</sub> /c (14)                            | P1 (1)                                                           |
| a/ Å                                                                | 14.352(1)                                          | 6.7898(3)                                                        |
| b/ Å                                                                | 14.9254(7)                                         | 6.9745(3)                                                        |
| c/ Å                                                                | 7.9099(5)                                          | 7.2523(4)                                                        |
| α/ deg                                                              | 90                                                 | 108.917(4)                                                       |
| β/ deg                                                              | 97.049(7)                                          | 99.404(4)                                                        |
| γ/ deg                                                              | 90                                                 | 113.677(4)                                                       |
| U/ Å <sup>3</sup>                                                   | 1681.6(2)                                          | 279.93(3)                                                        |
| Z                                                                   | 8                                                  | 1                                                                |
| μ(Mo-Kα)/mm <sup>-1</sup>                                           | 2.548                                              | 2.112                                                            |
| F(000)                                                              | 1072                                               | 166                                                              |
| Total no. reflections                                               | 13175                                              | 6650                                                             |
| Unique reflections                                                  | 3295                                               | 2205                                                             |
| R <sub>int</sub>                                                    | 0.079                                              | 0.033                                                            |
| No. of parameters,<br>restraints                                    | 149, 0                                             | 102, 3                                                           |
| R <sub>1</sub> <sup>b</sup> [I <sub>o</sub> > 2σ(I <sub>o</sub> )]  | 0.041                                              | 0.025                                                            |
| R <sub>1</sub> (all data)                                           | 0.074                                              | 0.027                                                            |
| wR <sub>2</sub> <sup>b</sup> [I <sub>o</sub> > 2σ(I <sub>o</sub> )] | 0.069                                              | 0.062                                                            |
| wR <sub>2</sub> (all data)                                          | 0.080                                              | 0.063                                                            |

**Reference S2.** M. G. B. Drew, D. A. Rice and D. M. Williams, *J. Chem. Soc., Dalton Trans.*, 1983, 2251.
